# Supplementary material
Source: HighWire-hosted journal article supplement (doi:10.1101/rna.079469.122)
Supplement: Supplemental_Legends.docx [file Supplemental_Legends.docx]

**Supplemental material**

**Supplemental Fig. 1**. Venn diagrams of the semi-extractability of DoGs in control and OS-treated HEK293 cells (A) and those in control and HS-treated HAP1 cells (B). The numbers of DoGs in each category are shown.

**Supplemental Fig. 2**. Venn diagrams of data reproducibility in Supplemental Fig. 1.

**Supplemental Fig. 3**. RNA-seq data of NEAT1 and MALAT1 using RNA samples prepared by conventional and improved methods from control and OS-treated HEK293 cells. NEAT1 and MALAT1 lncRNAs were used as positive and negative controls of semi-extractable RNA, respectively. DNA strands are shown by (+) and (-).

**Supplemental Fig. 4**. A. Focal numbers of SRSF1 and RPS12 DoGs in a nucleus and each cell number shown by a violin plot. B. RNA-FISH of DoG RNAs and immunofluorescence staining of known markers for various nuclear bodies. The names of nuclear bodies and markers are indicated on the left. Nuclei were counterstained with DAPI (blue). Scale bars correspond to 10 μm.

**Supplemental Table 1**.

Detected DoGs with semi-extractable and stress-inducible features. Averaged expression levels (FPKM) were calculated from semi-extractable RNA-seq data of HEK293 cells under the osmotic stress condition and HAP1 cells under the thermal stress condition.

**Supplemental Table 2**. Primers and FISH probes used in this study
