# Supplementary material
Source: HighWire-hosted journal article supplement (doi:10.1101/rna.079469.122)
Supplement: Supplemental_Table_1.xlsx [file Supplemental_Table_1.xlsx]

## Sheet: HS_semiextract_stress
The detected DoGs with semi-extractable and stress inducible features. Averaged expression levels (FPKM) calculated from semi-extractable RNA-seq data of HAP1 cells under the heat-shock stress condition.
geneID	gene_name	average_FPKM_exon	average_FPKM_down1000	average_FPKM_down5000	average_FPKM_down10000
ENSG00000003509.15	NDUFAF7	16.2235	6.677	7.0575	5.4275
ENSG00000003756.16	RBM5	16.69	2.3785	3.2435	1.9045
ENSG00000005059.15	MCUB	11.604	0.8805	1.035	0.7335
ENSG00000005889.15	ZFX	14.3965	3.3505	1.376	0.8265
ENSG00000007392.16	LUC7L	11.4065	1.8675	0.9525	0.876
ENSG00000009335.17	UBE3C	34.487	9.42	6.6165	4.7165
ENSG00000011275.18	RNF216	18.5185	2.5635	1.641	1.365
ENSG00000011295.15	TTC19	13.3235	1.6525	1.9585	1.403
ENSG00000011566.14	MAP4K3	18.7855	3.785	3.1945	2.357
ENSG00000012048.20	BRCA1	20.477	3.0415	2.537	1.7855
ENSG00000013375.15	PGM3	17.0695	0.9885	1.07	0.9165
ENSG00000018510.13	AGPS	21.048	3.475	1.8695	1.2965
ENSG00000018610.13	CXorf56	19.534	3.8935	2.022	2.0335
ENSG00000018699.11	TTC27	20.137	2.612	2.826	2.3905
ENSG00000020426.10	MNAT1	13.9985	2.363	1.6435	1.7635
ENSG00000021776.10	AQR	15.819	2.2715	2.3875	1.7485
ENSG00000023228.13	NDUFS1	32.722	3.09	5.333	3.6995
ENSG00000023697.12	DERA	16.241	2.674	3.321	2.803
ENSG00000024048.10	UBR2	19.352	1.6535	2.0365	1.4275
ENSG00000024526.16	DEPDC1	21.4335	2.24	2.1955	2.0455
ENSG00000025039.14	RRAGD	16.269	3.4455	2.0205	1.3245
ENSG00000030066.13	NUP160	34.1735	5.575	4.34	3.745
ENSG00000031698.12	SARS	79.337	18.711	10.7935	6.7965
ENSG00000033030.13	ZCCHC8	11.9075	2.859	1.5685	0.9615
ENSG00000034693.14	PEX3	11.337	2.147	1.3995	1.022
ENSG00000035928.15	RFC1	33.3185	6.6115	4.4565	3.893
ENSG00000036257.12	CUL3	15.7145	2.425	1.477	0.885
ENSG00000039123.15	SKIV2L2	36.2735	4.4185	4.6905	4.1545
ENSG00000043514.15	TRIT1	16.087	2.301	1.816	1.338
ENSG00000047621.11	C12orf4	12.1005	1.8375	1.3585	0.9785
ENSG00000048028.11	USP28	24.823	6.581	3.6955	2.1575
ENSG00000050426.15	LETMD1	10.922	1.3285	2.254	1.3795
ENSG00000052126.14	PLEKHA5	15.5215	2.735	1.616	1.529
ENSG00000053372.4	MRTO4	47.7125	11.098	6.26	3.5905
ENSG00000054654.16	SYNE2	24.149	1.976	2.1425	1.7785
ENSG00000054793.13	ATP9A	21.3675	2.4705	2.4235	1.743
ENSG00000055609.17	KMT2C	25.615	3.767	3.385	2.7345
ENSG00000058056.8	USP13	15.287	2.873	2.505	2.0805
ENSG00000059758.7	CDK17	13.562	3.9715	2.2735	2.635
ENSG00000060138.12	YBX3	20.805	3.074	2.528	2.341
ENSG00000060656.19	PTPRU	15.128	2.4395	2.2735	2.2985
ENSG00000061676.14	NCKAP1	15.4505	1.8235	2.49	2.954
ENSG00000062194.15	GPBP1	52.2145	9.2905	7.406	4.7335
ENSG00000064995.16	TAF11	34.811	3.756	3.9635	3.2545
ENSG00000065328.16	MCM10	35.71	3.893	3.926	2.9565
ENSG00000065526.10	SPEN	36.623	4.491	3.3125	3.78
ENSG00000066279.17	ASPM	40.3205	3.151	4.1405	3.265
ENSG00000067141.16	NEO1	17.235	2.285	2.168	1.414
ENSG00000068394.10	GPKOW	16.8555	3.5205	2.119	1.679
ENSG00000068784.12	SRBD1	15.076	1.978	1.5415	1.48
ENSG00000070814.17	TCOF1	21.0265	3.2265	3.1835	2.228
ENSG00000070882.12	OSBPL3	10.4835	2.9965	1.9585	1.858
ENSG00000071054.16	MAP4K4	17.3675	1.8835	2.026	1.856
ENSG00000071082.10	RPL31	71.7335	5.609	7.035	5.285
ENSG00000072682.18	P4HA2	19.071	12.495	7.066	4.3285
ENSG00000075151.20	EIF4G3	26.8845	4.108	3.371	3.174
ENSG00000075292.18	ZNF638	25.923	3.894	2.3035	2.3405
ENSG00000075711.20	DLG1	11.722	2.193	1.481	0.871
ENSG00000075856.11	SART3	29.6865	7.182	4.422	2.812
ENSG00000075975.15	MKRN2	19.9385	3.164	2.1515	1.2475
ENSG00000076108.11	BAZ2A	32.662	10.49	6.398	4.717
ENSG00000076242.14	MLH1	34.4685	4.989	3.7145	2.7605
ENSG00000077514.8	POLD3	11.2255	1.5135	1.11	0.8455
ENSG00000078674.17	PCM1	21.91	2.2235	1.694	1.389
ENSG00000079246.15	XRCC5	190.774	28.3	18.8765	16.2495
ENSG00000079459.12	FDFT1	39.637	3.7835	3.771	4.194
ENSG00000080503.22	SMARCA2	12.435	1.2505	1.2225	0.8375
ENSG00000080839.11	RBL1	14.1935	1.838	2.327	2.377
ENSG00000081014.10	AP4E1	14.693	2.7805	2.307	2.2405
ENSG00000081154.11	PCNP	24.3815	2.2705	2.3555	1.9115
ENSG00000082516.8	GEMIN5	24.2755	2.363	1.909	1.5225
ENSG00000083520.14	DIS3	13.14	1.143	1.4235	1.29
ENSG00000084070.11	SMAP2	12.3965	2.5005	1.1035	0.922
ENSG00000085982.13	USP40	12.092	0.88	1.2105	0.9615
ENSG00000086102.18	NFX1	15.3225	3.3055	2.4905	1.842
ENSG00000086232.12	EIF2AK1	35.1115	5.5735	3.6515	3.287
ENSG00000087053.18	MTMR2	16.908	2.0245	1.39	1.2795
ENSG00000087263.16	OGFOD1	10.2165	1.359	0.9905	0.8115
ENSG00000087302.8	C14orf166	25.8405	7.3635	4.956	3.3505
ENSG00000087448.9	KLHL42	10.0665	1.266	0.99	0.8055
ENSG00000088766.11	CRLS1	12.3735	2.8265	2.022	1.752
ENSG00000089009.15	RPL6	38.093	10.8275	4.0525	2.3485
ENSG00000089234.15	BRAP	10.265	1.158	1.674	1.375
ENSG00000089280.18	FUS	17.9205	3.7375	2.785	1.834
ENSG00000089737.16	DDX24	28.766	4.616	3.774	3.027
ENSG00000090621.13	PABPC4	28.443	4.8175	2.921	2.683
ENSG00000091140.13	DLD	22.214	2.116	1.782	1.694
ENSG00000092108.20	SCFD1	15.2855	2.6125	2.381	1.7685
ENSG00000095564.13	BTAF1	26.758	5.069	2.894	2.132
ENSG00000096070.19	BRPF3	13.956	3.444	3.237	2.182
ENSG00000096080.11	MRPS18A	33.775	4.7545	3.1725	1.844
ENSG00000097096.8	SYDE2	13.3915	2.44	4.2315	2.638
ENSG00000100330.15	MTMR3	11.1075	0.8345	0.8055	0.812
ENSG00000100528.11	CNIH1	19.6175	2.0855	1.4645	1.3945
ENSG00000100568.10	VTI1B	12.5955	1.5435	1.1805	1.1065
ENSG00000100575.13	TIMM9	14.406	2.2095	1.3595	1.3455
ENSG00000100664.10	EIF5	72.6645	15.8475	7.5015	4.174
ENSG00000100883.11	SRP54	26.8745	1.776	2.882	1.9975
ENSG00000100938.17	GMPR2	25.5105	5.0665	3.286	1.8705
ENSG00000100997.18	ABHD12	12.7295	1.2655	1.274	1.212
ENSG00000101019.21	UQCC1	15.158	2.501	1.5395	1.211
ENSG00000101350.7	KIF3B	15.196	1.5745	1.6635	1.2205
ENSG00000101391.20	CDK5RAP1	14.461	1.6365	1.4095	1.324
ENSG00000101557.14	USP14	27.4385	3.0895	2.364	1.5155
ENSG00000101639.18	CEP192	29.5925	5.2665	4.6005	4.2765
ENSG00000101974.14	ATP11C	42.1705	3.229	3.396	2.7575
ENSG00000102081.13	FMR1	19.0765	2.2095	1.777	1.2025
ENSG00000102144.13	PGK1	211.796	39.15	38.5215	29.4795
ENSG00000102158.19	MAGT1	41.0625	3.863	4.107	2.7555
ENSG00000102317.17	RBM3	104.252	32.483	11.29	5.8585
ENSG00000102572.14	STK24	14.1225	2.886	2.266	2.0935
ENSG00000102738.7	MRPS31	24.8665	2.688	2.991	3.1415
ENSG00000102763.17	VWA8	10.3335	0.927	1.055	0.7905
ENSG00000102908.20	NFAT5	14.112	2.2715	2.5785	2.383
ENSG00000103018.16	CYB5B	12.4975	2.009	1.3785	1.154
ENSG00000103222.18	ABCC1	16.74	1.591	2.0505	1.53
ENSG00000103415.11	HMOX2	15.4	1.8065	1.6335	0.98
ENSG00000103423.13	DNAJA3	17.7715	1.4355	1.213	1.257
ENSG00000103549.21	RNF40	32.5845	3.5825	3.4635	2.6145
ENSG00000103591.12	AAGAB	37.851	4.494	2.644	2.2465
ENSG00000103994.16	ZNF106	23.483	3.706	2.722	2.03
ENSG00000104147.8	OIP5	22.0485	4.154	2.675	1.7175
ENSG00000104221.12	BRF2	13.5475	9.2645	5.31	3.6075
ENSG00000105968.18	H2AFV	42.501	3.7695	3.679	2.3885
ENSG00000105993.14	DNAJB6	86.483	7.8625	5.7995	6.6185
ENSG00000106049.8	HIBADH	14.3645	1.4515	1.178	1.1085
ENSG00000106244.12	PDAP1	22.9185	3.0585	2.168	1.735
ENSG00000106462.10	EZH2	29.2185	4.9895	5.6065	3.793
ENSG00000106603.18	COA1	11.012	1.035	0.9775	0.728
ENSG00000106609.16	TMEM248	21.684	2.469	1.639	1.2285
ENSG00000106615.9	RHEB	13.327	1.2195	1.3835	0.8955
ENSG00000107175.11	CREB3	12.836	1.868	1.1105	0.719
ENSG00000107341.4	UBE2R2	21.0665	3.366	3.4195	2.821
ENSG00000107929.14	LARP4B	16.937	5.463	5.356	4.5385
ENSG00000107937.18	GTPBP4	40.686	8.9385	9.416	7.7025
ENSG00000108094.14	CUL2	14.938	1.8525	1.326	1.322
ENSG00000108100.17	CCNY	13.9485	1.56	1.961	1.6675
ENSG00000108256.8	NUFIP2	49.228	4.079	4.063	2.6655
ENSG00000108406.9	DHX40	14.6795	0.803	0.9325	0.797
ENSG00000108599.14	AKAP10	13.2805	3.924	2.955	2.284
ENSG00000108788.11	MLX	14.5525	1.7285	1.105	1.0765
ENSG00000109180.14	OCIAD1	35.6845	13.734	6.266	4.648
ENSG00000109475.16	RPL34	68.831	11.384	11.974	9.2685
ENSG00000109519.12	GRPEL1	23.333	4.3235	2.615	1.7995
ENSG00000109805.9	NCAPG	59.3045	8.454	5.5395	3.4705
ENSG00000110768.11	GTF2H1	12.6875	1.947	2.008	1.771
ENSG00000111237.18	VPS29	23.4065	3.3525	3.155	2.334
ENSG00000111364.15	DDX55	17.3025	4.99	2.8325	1.8125
ENSG00000111530.12	CAND1	36.4145	5.5575	5.41	3.631
ENSG00000111615.13	KRR1	13.1715	1.8845	2.141	2.115
ENSG00000111647.12	UHRF1BP1L	12.416	2.719	2.034	1.5595
ENSG00000111652.9	COPS7A	17.1515	1.715	2.006	1.3725
ENSG00000111786.8	SRSF9	34.759	3.908	3.4655	2.675
ENSG00000111875.7	ASF1A	17.2	1.824	2.129	2.3325
ENSG00000112237.12	CCNC	17.4825	2.071	2.3485	2.1
ENSG00000112312.9	GMNN	35.348	4.466	4.2725	3.5935
ENSG00000112319.17	EYA4	11.9465	1.3135	2.5735	2.3405
ENSG00000112339.14	HBS1L	20.024	7.3595	8.6675	8.622
ENSG00000112695.11	COX7A2	60.067	5.7005	4.977	3.507
ENSG00000112701.17	SENP6	14.045	4.6945	2.5385	1.892
ENSG00000112742.9	TTK	20.921	6.15	4.3955	3.042
ENSG00000112851.14	ERBIN	19.546	5.6065	5.072	4.663
ENSG00000113384.13	GOLPH3	36.988	6.2555	4.754	3.4895
ENSG00000113387.11	SUB1	16.474	1.483	1.9565	1.9785
ENSG00000113407.13	TARS	101.692	16.792	14.693	11.745
ENSG00000113569.15	NUP155	56.273	8.508	5.043	3.6605
ENSG00000113712.17	CSNK1A1	35.0055	4.0165	3.4755	2.324
ENSG00000114125.13	RNF7	15.6395	2.1925	2.1625	2.088
ENSG00000114416.17	FXR1	38.4085	9.198	5.4915	3.824
ENSG00000114850.6	SSR3	52.1245	5.8535	4.9235	4.0225
ENSG00000115163.14	CENPA	16.414	3.3345	1.983	1.5635
ENSG00000115355.15	CCDC88A	14.9755	3.5855	2.8295	2.2125
ENSG00000115464.14	USP34	31.549	3.6925	3.306	2.0935
ENSG00000115484.14	CCT4	263.815	33.4525	29.1295	26.349
ENSG00000115694.14	STK25	14.622	2.393	1.8175	1.4225
ENSG00000115761.15	NOL10	31.267	3.598	3.0695	2.319
ENSG00000115825.9	PRKD3	26.8685	3.1365	3.214	2.195
ENSG00000115840.13	SLC25A12	10.847	4.557	1.5085	0.885
ENSG00000115875.18	SRSF7	84.8425	11.6925	9.202	8.687
ENSG00000115904.12	SOS1	13.178	1.22	0.975	0.757
ENSG00000115966.16	ATF2	18.336	1.3895	1.011	1.1665
ENSG00000116030.16	SUMO1	39.4485	4.684	9.0105	7.02
ENSG00000116127.17	ALMS1	20.2495	3.861	3.202	2.6935
ENSG00000116350.16	SRSF4	23.1565	3.2265	3.1285	2.0305
ENSG00000116455.13	WDR77	34.803	3.012	3.1575	2.378
ENSG00000116580.18	GON4L	11.127	1.328	2.378	1.773
ENSG00000116863.10	ADPRHL2	11.1575	1.8065	1.1865	0.7575
ENSG00000117143.13	UAP1	18.152	2.488	2.0245	1.4395
ENSG00000117528.11	ABCD3	13.061	0.881	1.0195	0.8265
ENSG00000118900.14	UBN1	16.3005	3.428	2.074	2.1145
ENSG00000119314.15	PTBP3	17.325	2.487	1.3405	1.307
ENSG00000119318.12	RAD23B	57.557	9.9255	10.489	9.9385
ENSG00000119396.10	RAB14	16.6075	3.4455	2.9665	2.561
ENSG00000119523.9	ALG2	11.3475	1.868	1.434	0.8685
ENSG00000119682.16	AREL1	16.4395	3.211	2.201	1.4885
ENSG00000119689.14	DLST	34.418	6.8435	5.251	3.2105
ENSG00000119707.13	RBM25	20.1005	3.861	2.7295	1.6515
ENSG00000119912.15	IDE	22.933	5.329	2.7425	1.8335
ENSG00000119969.14	HELLS	28.64	4.571	3.525	2.7335
ENSG00000120158.11	RCL1	13.278	1.575	1.6615	1.447
ENSG00000120278.15	PLEKHG1	12.094	1.0345	0.862	0.654
ENSG00000120656.11	TAF12	14.974	2.441	1.303	8.7485
ENSG00000120694.19	HSPH1	611.987	121.68	103.999	54.228
ENSG00000120727.12	PAIP2	38.3035	2.765	3.6515	2.843
ENSG00000120833.13	SOCS2	11.3985	11.8565	5.8285	4.0515
ENSG00000121073.13	SLC35B1	13.3875	2.3935	2.296	1.394
ENSG00000121211.7	MND1	19.383	2.2875	2.7335	2.1145
ENSG00000121281.12	ADCY7	10.346	5.346	6.4565	5.8775
ENSG00000121579.12	NAA50	52.8715	12.8405	8.7515	5.8835
ENSG00000121774.17	KHDRBS1	83.0285	18.236	10.486	7.347
ENSG00000122882.10	ECD	24.3635	2.023	6.7015	5.7435
ENSG00000123485.11	HJURP	19.7235	2.98	1.881	1.1645
ENSG00000123575.8	FAM199X	25.1	1.9935	1.923	1.4695
ENSG00000124164.15	VAPB	16.0565	1.9455	1.7975	1.3885
ENSG00000124172.9	ATP5E	30.2565	6.641	4.1085	2.7405
ENSG00000124228.14	DDX27	20.4645	6.5185	5.3825	3.81
ENSG00000124356.15	STAMBP	12.221	1.931	1.328	0.927
ENSG00000124587.13	PEX6	17.591	2.7785	3.1565	1.9825
ENSG00000124766.6	SOX4	11.27	2.239	1.2165	0.826
ENSG00000125378.15	BMP4	12.7695	2.8425	4.545	5.672
ENSG00000125450.10	NUP85	25.829	4.3535	4.1645	3.017
ENSG00000125977.6	EIF2S2	53.17	3.846	5.121	5.6985
ENSG00000126067.11	PSMB2	45.799	5.6665	6.873	4.8375
ENSG00000126581.12	BECN1	10.2515	2.2545	1.6775	1.3955
ENSG00000126777.17	KTN1	17.1375	1.513	1.178	1.194
ENSG00000128463.12	EMC4	15.8125	2.441	1.5865	1.3685
ENSG00000128595.16	CALU	56.9745	11.335	5.7725	3.159
ENSG00000128654.13	MTX2	27.2425	4.4025	2.5345	2.251
ENSG00000128789.20	PSMG2	18.291	3.0265	2.3595	1.5265
ENSG00000129173.12	E2F8	13.0345	2.208	1.412	0.7605
ENSG00000129460.15	NGDN	17.1015	5.4685	4.127	4.4145
ENSG00000130560.8	UBAC1	22.906	2.146	2.122	2.019
ENSG00000130766.4	SESN2	14.2745	4.5095	2.0335	1.3235
ENSG00000130935.9	NOL11	27.2595	2.364	2.1795	1.898
ENSG00000131100.12	ATP6V1E1	21.0335	3.0125	3.4775	2.4535
ENSG00000131470.14	PSMC3IP	11.5695	2.7485	1.659	0.937
ENSG00000131558.14	EXOC4	10.262	1.5745	1.3865	1.3965
ENSG00000131725.13	WDR44	15.7805	1.931	2.4955	2.092
ENSG00000132300.18	PTCD3	25.349	3.784	3.4085	2.9745
ENSG00000132963.7	POMP	81.971	11.539	9.9455	7.955
ENSG00000133142.17	TCEAL4	15.7095	3.953	1.7405	1.3735
ENSG00000133226.16	SRRM1	17.4075	1.374	1.466	1.282
ENSG00000133773.11	CCDC59	21.431	1.992	1.2985	1.3625
ENSG00000133858.15	ZFC3H1	13.189	6.8565	5.483	4.952
ENSG00000134077.15	THUMPD3	16.7065	3.738	2.3565	1.593
ENSG00000134109.10	EDEM1	10.9175	1.7135	1.2195	0.9415
ENSG00000134247.9	PTGFRN	23.31	1.96	2.1385	1.859
ENSG00000134283.17	PPHLN1	10.995	2.425	1.0225	1.0995
ENSG00000134419.15	RPS15A	21.345	2.7805	3.0435	3.1695
ENSG00000134444.13	KIAA1468	13.3585	4.158	3.9105	3.8285
ENSG00000134684.10	YARS	52.5115	11.3035	6.698	3.731
ENSG00000134697.12	GNL2	33.4535	5.032	3.041	2.2025
ENSG00000134748.12	PRPF38A	24.2875	3.9105	4.151	3.3125
ENSG00000134900.11	TPP2	16.612	3.5375	1.8565	1.5255
ENSG00000135048.13	TMEM2	20.4575	1.528	1.624	1.205
ENSG00000135049.15	AGTPBP1	15.1425	1.483	1.732	1.1575
ENSG00000135334.8	AKIRIN2	17.071	1.3125	2.1825	1.9445
ENSG00000135336.14	ORC3	23.534	3.0115	2.946	2.1235
ENSG00000135341.17	MAP3K7	15.386	1.5915	1.849	1.266
ENSG00000135870.11	RC3H1	10.5605	1.421	1.337	0.968
ENSG00000135930.13	EIF4E2	12.307	2.6085	1.4645	0.8065
ENSG00000136021.18	SCYL2	14.102	2.1475	1.8835	1.8385
ENSG00000136143.14	SUCLA2	15.277	1.592	2.468	1.8295
ENSG00000136271.10	DDX56	37.6015	10.067	7.257	4.69
ENSG00000136522.13	MRPL47	56.82	5.0505	4.6235	3.943
ENSG00000136861.17	CDK5RAP2	21.3415	2.408	2.1125	1.707
ENSG00000136868.10	SLC31A1	12.243	2.2085	1.0905	0.811
ENSG00000136891.13	TEX10	16.9115	1.9305	1.282	1.179
ENSG00000136930.12	PSMB7	110.873	9.033	8.9455	7.1895
ENSG00000136938.8	ANP32B	44.276	5.5615	5.431	4.4085
ENSG00000137055.14	PLAA	18.9255	3.2295	2.4335	1.937
ENSG00000137692.11	DCUN1D5	40.373	6.8595	4.8145	5.2355
ENSG00000137996.12	RTCA	15.3545	2.6275	1.556	1.8495
ENSG00000138069.16	RAB1A	37.4945	7.1925	4.2535	4.135
ENSG00000138078.15	PREPL	14.052	0.819	1.2085	1.0935
ENSG00000138160.5	KIF11	56.661	7.627	5.593	3.314
ENSG00000138182.14	KIF20B	25.834	3.9735	2.828	4.1065
ENSG00000138399.17	FASTKD1	15.0385	2.1155	1.942	1.705
ENSG00000138614.14	INTS14	34.4	4.805	3.3545	2.647
ENSG00000138802.11	SEC24B	13.716	1.499	2.026	1.6735
ENSG00000139131.12	YARS2	15.676	4.2475	1.815	1.34
ENSG00000139218.17	SCAF11	13.0265	0.958	0.9155	0.7915
ENSG00000139343.10	SNRPF	20.5205	2.749	1.2955	1.136
ENSG00000139620.12	KANSL2	21.282	2.7955	2.8285	1.913
ENSG00000140307.10	GTF2A2	19.4225	1.4675	1.9995	1.327
ENSG00000140525.17	FANCI	69.489	8.8475	6.239	4.7085
ENSG00000140612.13	SEC11A	40.566	5.639	4.282	3.4435
ENSG00000140650.11	PMM2	11.4615	6.744	3.825	3.017
ENSG00000140740.10	UQCRC2	48.824	7.273	6.688	6.2565
ENSG00000141027.20	NCOR1	23.333	1.838	2.1765	1.594
ENSG00000141456.14	PELP1	13.2545	1.1735	1.4295	1.265
ENSG00000141759.14	TXNL4A	26.022	7.3355	4.148	3.005
ENSG00000141971.12	MVB12A	11.201	2.087	3.0005	2.635
ENSG00000143033.17	MTF2	18.7125	2.999	3.645	3.829
ENSG00000143384.12	MCL1	44.2645	3.9855	3.1635	2.293
ENSG00000143393.16	PI4KB	15.4975	1.1725	1.42	1.082
ENSG00000143476.17	DTL	47.478	6.0845	5.6785	4.277
ENSG00000143514.16	TP53BP2	17.2905	2.0085	2.024	1.929
ENSG00000143622.10	RIT1	17.4985	3.277	4.1485	3.824
ENSG00000143753.12	DEGS1	17.993	2.4405	2.3685	1.699
ENSG00000143776.18	CDC42BPA	21.5955	4.815	4.0775	2.3845
ENSG00000143815.14	LBR	47.2615	6.2065	4.4325	3.9
ENSG00000143977.13	SNRPG	15.492	3.0755	2.1705	1.8345
ENSG00000144034.14	TPRKB	13.5605	5.248	1.634	1.5625
ENSG00000144357.16	UBR3	12.348	2.1005	1.5575	1.325
ENSG00000144381.16	HSPD1	493.671	105.934	43.042	27.0145
ENSG00000144554.10	FANCD2	23.439	1.962	2.6895	2.3575
ENSG00000145191.12	EIF2B5	30.308	8.1255	4.8685	3.224
ENSG00000145246.13	ATP10D	37.675	6.5205	4.6625	4.688
ENSG00000145349.16	CAMK2D	13.836	1.451	1.1605	0.9815
ENSG00000145592.13	RPL37	75.954	7.308	8.1205	6.306
ENSG00000145734.18	BDP1	16.776	3.4885	2.5895	2.256
ENSG00000145740.18	SLC30A5	12.7785	1.035	1.8415	1.3185
ENSG00000146007.10	ZMAT2	36.9535	2.6875	11.761	5.724
ENSG00000146223.14	RPL7L1	19.3825	4.307	2.1085	1.388
ENSG00000146282.17	RARS2	29.086	3.445	4.898	5.356
ENSG00000147166.10	ITGB1BP2	19.037	9.9785	4.936	5.478
ENSG00000147174.11	GCNA	24.953	4.848	4.481	3.913
ENSG00000147677.10	EIF3H	37.848	6.2995	5.419	4.091
ENSG00000147853.16	AK3	19.4135	1.7295	1.652	1.5145
ENSG00000147905.17	ZCCHC7	12.782	2.2395	1.542	1.184
ENSG00000148019.12	CEP78	17.5695	1.2045	3.3295	3.276
ENSG00000148843.13	PDCD11	34.4995	5.154	3.3395	2.362
ENSG00000149100.12	EIF3M	50.504	3.5535	4.7245	3.7435
ENSG00000149201.9	CCDC81	18.2115	12.1725	8.6005	11.754
ENSG00000149474.13	KAT14	10.486	1.8995	1.475	0.8725
ENSG00000151012.13	SLC7A11	30.7835	4.85	3.182	2.839
ENSG00000151292.17	CSNK1G3	12.7515	2.873	1.461	0.9015
ENSG00000151718.15	WWC2	15.4315	1.916	1.796	1.4945
ENSG00000151914.19	DST	17.939	1.3595	1.749	1.5825
ENSG00000152242.10	C18orf25	12.939	2.1475	3.406	3.3495
ENSG00000153933.9	DGKE	15.0275	7.3565	4.434	3.0195
ENSG00000153975.9	ZUFSP	23.37	12.235	11.4445	9.9115
ENSG00000154124.4	OTULIN	12.4125	4.014	3.963	3.7605
ENSG00000154174.7	TOMM70	31.7035	3.134	4.2615	2.8875
ENSG00000154723.12	ATP5J	28.3435	2.4395	2.24	1.675
ENSG00000155096.13	AZIN1	40.395	3.368	2.901	2.158
ENSG00000155097.11	ATP6V1C1	19.2715	2.92	2.0395	1.1795
ENSG00000155115.6	GTF3C6	30.358	4.34	2.932	1.7795
ENSG00000155363.18	MOV10	15.2975	5.2775	1.885	1.06
ENSG00000155438.11	NIFK	45.245	4.309	4.03	2.2965
ENSG00000155506.16	LARP1	67.902	7.7935	6.9845	4.9205
ENSG00000155827.11	RNF20	17.1215	1.313	1.2955	1.178
ENSG00000156531.16	PHF6	30.4025	3.6615	4.1625	3.3055
ENSG00000157077.14	ZFYVE9	16.402	2.301	2.2995	1.9885
ENSG00000157191.19	NECAP2	12.2015	4.8045	4.423	4.36
ENSG00000158042.8	MRPL17	21.4205	2.9495	1.952	1.58
ENSG00000158526.7	TSR2	23.442	3.057	2.706	1.6335
ENSG00000158636.16	EMSY	11.1245	3.5685	3.508	2.6485
ENSG00000158882.14	TOMM40L	10.653	1.5285	1.0645	0.809
ENSG00000159055.3	MIS18A	18.31	2.363	1.4365	1.2015
ENSG00000159210.9	SNF8	13.3115	3.551	1.4515	0.8425
ENSG00000159322.17	ADPGK	26.204	4.355	3.7435	2.819
ENSG00000159596.6	TMEM69	13.47	5.5465	3.7255	3.255
ENSG00000160049.11	DFFA	16.845	1.7135	1.626	1.623
ENSG00000160214.12	RRP1	17.707	3.4585	2.227	1.378
ENSG00000160447.6	PKN3	14.646	2.763	2.2735	2.1195
ENSG00000161204.11	ABCF3	10.7405	7.136	5.4395	3.553
ENSG00000161526.14	SAP30BP	11.047	5.2185	2.2145	1.3105
ENSG00000162073.13	PAQR4	23.021	3.6585	2.6375	1.6165
ENSG00000162734.12	PEA15	14.2395	1.483	1.311	1.0635
ENSG00000162972.10	MAIP1	17.529	2.163	2.804	2.0675
ENSG00000163374.19	YY1AP1	10.5845	3.674	2.978	2.171
ENSG00000163541.11	SUCLG1	27.021	5.236	3.386	3.8005
ENSG00000163584.17	RPL22L1	16.16	3.706	1.6735	1.129
ENSG00000163625.15	WDFY3	17.442	2.966	1.964	1.7375
ENSG00000163634.11	THOC7	16.0505	0.989	1.5935	1.5365
ENSG00000164104.11	HMGB2	149.817	19.4785	18.6375	11.982
ENSG00000164105.3	SAP30	16.9745	2.9665	2.885	2.311
ENSG00000164109.13	MAD2L1	22.2555	3.3215	2.2835	1.713
ENSG00000164134.12	NAA15	37.4765	4.757	3.1315	2.1955
ENSG00000164347.17	GFM2	48.7685	11.3845	9.644	6.393
ENSG00000164406.7	LEAP2	15.68	8.9445	10.637	8.5645
ENSG00000164430.15	MB21D1	32.7925	5.875	5.0035	5.1165
ENSG00000164548.10	TRA2A	20.0245	1.6995	2.399	1.8925
ENSG00000164631.18	ZNF12	11.927	1.575	0.981	0.8195
ENSG00000165219.21	GAPVD1	18.87	1.529	1.3885	1.246
ENSG00000165280.15	VCP	145.207	15.313	13.25	11.4195
ENSG00000165288.10	BRWD3	15.374	2.843	2.0685	1.811
ENSG00000165392.9	WRN	12.4895	1.513	1.264	1.317
ENSG00000165527.6	ARF6	18.135	1.9005	1.592	1.3965
ENSG00000165588.16	OTX2	99.8735	15.9605	8.1785	6.0285
ENSG00000165688.11	PMPCA	15.1405	1.421	1.9555	1.472
ENSG00000166012.16	TAF1D	51.3555	13.574	6.5975	3.712
ENSG00000166086.12	JAM3	33.2545	5.3725	5.611	4.9545
ENSG00000166171.12	DPCD	10.2435	0.803	0.7435	0.643
ENSG00000166233.14	ARIH1	16.0705	1.87	2.4365	2.1615
ENSG00000166478.9	ZNF143	11.425	1.2345	1.304	0.923
ENSG00000166788.9	SAAL1	15.675	1.205	1.3445	1.0335
ENSG00000166851.14	PLK1	35.196	3.706	4.6945	4.266
ENSG00000167088.10	SNRPD1	22.141	1.3745	2.0935	1.711
ENSG00000167670.15	CHAF1A	30.2375	6.2645	4.961	3.5475
ENSG00000167721.10	TSR1	44.9535	8.0765	6.48	4.9265
ENSG00000167969.12	ECI1	19.0615	5.0005	2.4995	1.958
ENSG00000168028.13	RPSA	57.6255	9.191	7.693	5.214
ENSG00000168137.15	SETD5	53.3935	4.9415	5.757	4.006
ENSG00000168256.17	NKIRAS2	15.0295	3.5835	1.934	1.1555
ENSG00000169083.16	AR	23.004	2.7175	2.0045	1.213
ENSG00000169217.8	CD2BP2	30.454	5.8225	3.5725	2.787
ENSG00000169564.6	PCBP1	56.7185	6.655	5.0795	4.2715
ENSG00000169679.14	BUB1	45.986	10.235	3.7995	2.7025
ENSG00000169905.12	TOR1AIP2	12.738	2.1615	2.0275	2.2975
ENSG00000170035.15	UBE2E3	29.7605	5.1135	5.698	5.0845
ENSG00000170037.13	CNTROB	14.0405	3.6785	2.865	2.179
ENSG00000170144.20	HNRNPA3	47.7255	13.257	9.319	7.6385
ENSG00000170264.12	FAM161A	18.007	5.287	4.061	4.414
ENSG00000170627.10	GTSF1	34.4035	4.742	3.3215	2.394
ENSG00000170921.15	TANC2	16.9155	2.918	1.645	1.209
ENSG00000171103.10	TRMT61B	13.1395	2.3795	2.653	2.5005
ENSG00000171109.18	MFN1	15.14	2.8575	2.126	2.333
ENSG00000171126.7	KCNG3	14.7235	14.4365	9.9065	9.1685
ENSG00000171204.12	TMEM126B	17.495	1.576	1.621	1.101
ENSG00000171311.12	EXOSC1	13.129	2.3485	1.907	1.536
ENSG00000171316.11	CHD7	26.9015	2.9345	3.2575	2.4065
ENSG00000171530.13	TBCA	16.313	1.715	1.3825	1.2865
ENSG00000171863.12	RPS7	13.8085	7.971	4.9825	3.2755
ENSG00000172172.7	MRPL13	17.5105	2.516	1.9905	1.518
ENSG00000172428.10	COPS9	23.0095	4.568	2.969	2.432
ENSG00000172493.20	AFF1	10.715	2.177	1.379	1.4235
ENSG00000172943.19	PHF8	13.6695	3.7835	3.18	2.1835
ENSG00000173064.12	HECTD4	14.625	2.6095	1.5165	1.307
ENSG00000173110.7	HSPA6	160.555	30.8115	12.904	10.244
ENSG00000173261.8	PLAC8L1	12.3745	2.7335	1.427	0.7985
ENSG00000173418.11	NAA20	18.111	2.4565	2.014	1.652
ENSG00000173726.10	TOMM20	68.842	11.785	7.8755	4.651
ENSG00000174579.3	MSL2	14.7255	3.228	3.292	2.625
ENSG00000174652.17	ZNF266	12.919	3.5995	1.935	1.2215
ENSG00000174891.12	RSRC1	12.5835	0.927	1.16	1.138
ENSG00000175390.13	EIF3F	15.674	3.042	2.716	1.626
ENSG00000176102.11	CSTF3	28.444	4.277	3.113	2.133
ENSG00000176261.15	ZBTB8OS	14.7675	1.9155	1.568	1.6945
ENSG00000176731.11	C8orf59	18.0965	1.824	2.025	1.519
ENSG00000177084.16	POLE	16.527	3.876	1.6745	1.3715
ENSG00000178761.14	FAM219B	27.619	3.737	3.6525	2.6405
ENSG00000178980.14	SELENOW	23.746	3.7395	2.966	2.127
ENSG00000179331.2	RAB39A	13.241	3.5545	6.204	3.524
ENSG00000181610.12	MRPS23	16.768	3.429	1.853	1.248
ENSG00000181704.11	YIPF6	15.811	2.626	2.1645	1.6335
ENSG00000181744.8	C3orf58	14.33	2.348	1.262	1.318
ENSG00000181991.15	MRPS11	16.611	2.8405	1.726	1.1735
ENSG00000182199.10	SHMT2	49.903	8.6165	8.468	5.3385
ENSG00000182827.8	ACBD3	22.0155	4.539	2.9025	1.8215
ENSG00000182963.9	GJC1	19.885	3.954	2.5965	1.617
ENSG00000182973.18	CNOT10	17.2695	2.812	3.536	2.645
ENSG00000183337.16	BCOR	25.576	4.7825	2.096	1.571
ENSG00000183520.11	UTP11	19.699	1.976	1.814	1.2475
ENSG00000183527.11	PSMG1	27.6735	4.3405	4.5195	4.1585
ENSG00000183763.8	TRAIP	11.2385	2.1315	1.2605	0.9555
ENSG00000184007.18	PTP4A2	22.248	2.193	1.392	1.385
ENSG00000184349.12	EFNA5	15.574	1.282	1.133	0.945
ENSG00000184432.9	COPB2	28.006	7.0405	2.748	1.8305
ENSG00000184677.16	ZBTB40	16.632	2.61	2.14	1.633
ENSG00000185238.12	PRMT3	14.803	3.0115	1.777	0.918
ENSG00000185896.10	LAMP1	23.6345	3.8295	2.358	1.6545
ENSG00000185963.13	BICD2	11.7775	1.744	1.1475	0.736
ENSG00000186416.13	NKRF	148.872	24.5715	18.245	12.8015
ENSG00000186468.12	RPS23	123.836	12.041	9.166	8.2415
ENSG00000187079.16	TEAD1	32.7245	5.5005	4.0295	2.2605
ENSG00000187257.15	RSBN1L	12.529	1.252	1.1525	1.045
ENSG00000187555.14	USP7	52.234	7.6	6.495	4.422
ENSG00000188153.12	COL4A5	17.229	1.4525	2.221	1.6005
ENSG00000188342.11	GTF2F2	19.0645	3.615	2.582	3.543
ENSG00000188994.12	ZNF292	13.494	1.4675	1.674	1.6945
ENSG00000189043.9	NDUFA4	33.658	3.214	2.9475	2.5515
ENSG00000189241.6	TSPYL1	15.8245	1.6685	1.604	1.444
ENSG00000196199.13	MPHOSPH8	15.066	2.981	1.813	1.0735
ENSG00000196236.12	XPNPEP3	21.9585	8.853	4.0065	3.2745
ENSG00000196290.14	NIF3L1	25.4685	2.454	2	1.7155
ENSG00000196367.12	TRRAP	26.278	3.921	2.6045	2.8165
ENSG00000196378.11	ZNF34	14.992	3.4165	3.596	3.7455
ENSG00000196455.7	PIK3R4	19.605	2.3795	2.489	2.128
ENSG00000196504.15	PRPF40A	34.6785	5.454	4.634	3.772
ENSG00000196510.12	ANAPC7	26.8445	5.745	4.847	3.4
ENSG00000196591.11	HDAC2	13.566	1.159	1.4325	1.1975
ENSG00000196652.11	ZKSCAN5	12.382	2.3325	1.7795	1.328
ENSG00000196821.9	C6orf106	30.431	3.397	3.213	2.4725
ENSG00000196865.4	NHLRC2	12.024	1.219	0.91	0.8
ENSG00000197008.9	ZNF138	19.1755	6.6405	3.7295	2.7
ENSG00000197111.15	PCBP2	45.835	5.68	7.7395	5.9135
ENSG00000197323.11	TRIM33	15.504	1.437	1.292	1.042
ENSG00000197579.7	TOPORS	14.728	1.499	1.661	1.288
ENSG00000198130.15	HIBCH	25.319	9.8685	6.495	5.2645
ENSG00000198189.10	HSD17B11	28.2955	3.4295	4.1995	3.0835
ENSG00000198315.10	ZKSCAN8	15.658	1.483	1.233	1.3125
ENSG00000198355.4	PIM3	22.1105	2.193	2.4505	1.7195
ENSG00000198369.9	SPRED2	12.5765	3.505	2.837	1.907
ENSG00000198492.15	YTHDF2	31.919	2.7185	2.4075	1.9855
ENSG00000198554.11	WDHD1	29.512	4.7115	6.2905	5.0105
ENSG00000198586.13	TLK1	14.1065	2.4565	3.581	2.687
ENSG00000198805.11	PNP	13.0795	2.5175	1.88	0.9775
ENSG00000198818.9	SFT2D1	14.945	1.406	1.4485	1.1225
ENSG00000198830.10	HMGN2	39.611	13.747	4.572	3.532
ENSG00000198836.8	OPA1	38.878	6.059	5.9815	4.73
ENSG00000198856.12	OSTC	34.9935	4.418	4.8045	3.8515
ENSG00000198887.8	SMC5	24.2715	3.7875	5.9255	4.7665
ENSG00000198918.7	RPL39	81.5965	15.3285	16.366	12.6455
ENSG00000205302.6	SNX2	35.2935	3.6015	5.036	4.806
ENSG00000206418.3	RAB12	19.591	2.948	2.258	1.623
ENSG00000206557.5	TRIM71	13.2045	3.009	1.6525	0.9345
ENSG00000213246.6	SUPT4H1	23.796	4.0615	2.1365	1.745
ENSG00000213995.11	NAXD	22.944	4.3075	2.3925	1.9035
ENSG00000214078.12	CPNE1	24.1855	4.465	2.802	3.0845
ENSG00000214226.8	C17orf67	11.813	1.4525	2.936	2.668
ENSG00000221978.11	CCNL2	20.119	2.379	2.0495	1.9875
ENSG00000230989.6	HSBP1	12.2625	1.3595	1.1435	1.1135
ENSG00000250479.8	CHCHD10	23.3815	9.02	3.8745	2.62
ENSG00000257103.8	LSM14A	28.1875	9.2485	6.6705	4.584
ENSG00000261236.7	BOP1	26.191	2.871	2.5945	2.09
ENSG00000265354.3	TIMM23	71.372	6.0395	8.781	5.6485
ENSG00000269720.2	CCDC194	22.8775	22	14.4265	11.574
ENSG00000275052.4	PPP4R3B	17.869	1.3285	2.1265	1.8445

## Sheet: Sorbi_semiextract_stress
The detected DoGs with semi-extractable and stress inducible features. Averaged expression levels (FPKM) calculated from semi-extractable RNA-seq data of HEK293 cells under the osmotic stress condition.
geneID	gene_name	average_FPKM_exon	average_FPKM_down1000	average_FPKM_down5000	average_FPKM_down10000
ENSG00000001084.10	GCLC	10.8905	3.0385	2.359	1.414
ENSG00000003756.16	RBM5	13	1.11	1.6995	1.3095
ENSG00000005812.10	FBXL3	28.263	6.363	7.1795	6.609
ENSG00000005889.15	ZFX	29.463	7.8255	3.745	3.1825
ENSG00000005893.15	LAMP2	23.883	4.9815	2.1655	1.791
ENSG00000007944.14	MYLIP	31.8445	6.2755	8.4925	8.1375
ENSG00000008083.13	JARID2	11.3005	0.9105	1.3535	1.163
ENSG00000008294.20	SPAG9	59.186	14.1285	10.021	7.7255
ENSG00000009335.17	UBE3C	40.0825	7.341	4.929	3.73
ENSG00000011007.12	ELOA	48.979	13.712	11.5795	8.9975
ENSG00000011009.10	LYPLA2	16.151	1.9175	2.6585	2.109
ENSG00000011295.15	TTC19	19.049	1.779	2.1075	1.747
ENSG00000011426.10	ANLN	53.423	8.837	10.6755	8.2075
ENSG00000013503.9	POLR3B	14.02	1.519	1.178	0.7475
ENSG00000015676.17	NUDCD3	13.859	1.4495	1.8965	1.514
ENSG00000018510.13	AGPS	18.8485	2.073	1.4275	1.1135
ENSG00000019995.6	ZRANB1	28.5975	3.031	3.4235	2.9545
ENSG00000021776.10	AQR	13.949	2.99	2.3835	1.693
ENSG00000022840.15	RNF10	17.8755	2.6205	2.4165	1.893
ENSG00000023697.12	DERA	14.963	3.0405	3.5055	3.2805
ENSG00000028203.17	VEZT	13.872	1.5305	1.253	1.4105
ENSG00000031003.10	FAM13B	11.343	6.4165	4.917	3.6
ENSG00000033030.13	ZCCHC8	12.67	5.4215	3.359	2.7205
ENSG00000034677.12	RNF19A	12.6915	4.9475	5.378	4.417
ENSG00000043355.11	ZIC2	20.823	5.5005	5.6365	5.36
ENSG00000047230.14	CTPS2	14.004	2.1445	2.4525	2.1695
ENSG00000047621.11	C12orf4	11.7605	1.469	1.0585	0.8245
ENSG00000048162.20	NOP16	11.579	2.419	1.6245	1.4375
ENSG00000048392.11	RRM2B	13.297	6.9805	4.983	4.794
ENSG00000052749.13	RRP12	13.6155	3.951	2.8895	2.3885
ENSG00000055208.18	TAB2	21.6505	2.426	2.521	2.5785
ENSG00000055211.12	GINM1	20.42	1.289	2.1725	1.4195
ENSG00000055609.17	KMT2C	13.413	1.0075	0.9375	0.854
ENSG00000055917.15	PUM2	29.8505	6.757	7.2175	6.043
ENSG00000056586.15	RC3H2	22.022	3.0225	2.536	2.0635
ENSG00000058272.16	PPP1R12A	12.2135	1.81	1.231	1.301
ENSG00000060138.12	YBX3	28.202	4.3725	4.0305	4.084
ENSG00000060237.16	WNK1	28.6975	2.2275	2.3115	1.9415
ENSG00000062194.15	GPBP1	32.4255	3.3485	3.473	3.7025
ENSG00000062485.18	CS	27.289	2.695	1.872	1.388
ENSG00000064651.13	SLC12A2	13.9485	5.908	5.325	4.38
ENSG00000064703.11	DDX20	10.1745	2.8275	1.5995	1.138
ENSG00000065183.15	WDR3	31.0705	3.3215	3.573	3.205
ENSG00000065883.14	CDK13	21.159	3.5615	2.3665	2.4965
ENSG00000066027.11	PPP2R5A	15.8925	1.954	1.583	1.403
ENSG00000066279.17	ASPM	39.3755	4.277	5.0595	4.2445
ENSG00000066933.15	MYO9A	15.131	5.058	3.805	2.4395
ENSG00000067064.10	IDI1	51.625	5.3745	7.519	5.855
ENSG00000068654.15	POLR1A	14.704	1.9085	2.053	1.729
ENSG00000069849.10	ATP1B3	55.6225	6.732	9.1975	7.429
ENSG00000070882.12	OSBPL3	16.1105	9.511	6.679	6.1215
ENSG00000071243.15	ING3	16.8735	10.293	8.307	8.023
ENSG00000072736.18	NFATC3	10.9535	1.5935	1.2465	0.894
ENSG00000073417.14	PDE8A	13.461	1.296	1.1245	1.073
ENSG00000075785.12	RAB7A	25.5845	3.5255	3.158	3.2005
ENSG00000075856.11	SART3	25.1395	7.992	5.0605	3.816
ENSG00000076043.9	REXO2	13.716	1.972	1.71	1.579
ENSG00000076108.11	BAZ2A	11.7695	1.42	1.1735	0.9705
ENSG00000076513.16	ANKRD13A	15.4275	1.451	1.277	1.0285
ENSG00000076604.14	TRAF4	28.053	8.378	6	6.1235
ENSG00000077721.15	UBE2A	13.669	3.046	2.356	1.8145
ENSG00000078140.13	UBE2K	26.1875	2.9845	2.4285	1.9605
ENSG00000079819.18	EPB41L2	21.9305	2.471	1.7715	1.56
ENSG00000080345.17	RIF1	26.7975	1.752	1.5335	1.457
ENSG00000080815.18	PSEN1	17.1505	3.0105	3.259	3.058
ENSG00000081154.11	PCNP	27.5835	1.6835	2.0215	1.7645
ENSG00000081181.7	ARG2	17.14	2.1755	1.389	1.1495
ENSG00000081870.11	HSPB11	11.676	1.3015	1.4695	1.2825
ENSG00000082153.17	BZW1	15.836	2.3305	1.5015	1.162
ENSG00000082258.12	CCNT2	13.9725	4.205	3.389	2.5365
ENSG00000082516.8	GEMIN5	18.1215	1.46	1.243	0.967
ENSG00000083312.17	TNPO1	41.3835	9.6555	7.052	4.872
ENSG00000083520.14	DIS3	42.987	4.848	5.064	4.6635
ENSG00000083896.12	YTHDC1	25.614	3.6005	3.9365	3.276
ENSG00000084093.16	REST	11.334	1.514	0.713	0.728
ENSG00000085224.21	ATRX	17.053	3.311	2.071	1.7225
ENSG00000085465.12	OVGP1	29.4495	6.0975	3.3325	2.6785
ENSG00000085788.13	DDHD2	10.799	1.336	0.826	0.6785
ENSG00000085998.13	POMGNT1	14.869	2.711	1.9035	1.712
ENSG00000086189.9	DIMT1	13.7885	5.1635	4.2785	4.143
ENSG00000086666.18	ZFAND6	18.1445	2.5085	2.1975	1.7685
ENSG00000087191.12	PSMC5	13.9635	2.3105	1.6295	1.5025
ENSG00000087301.8	TXNDC16	15.2085	3.163	3.4165	3.143
ENSG00000089006.16	SNX5	35.116	25.532	20.347	16.7545
ENSG00000089063.14	TMEM230	14.53	1.3555	1.1395	1.129
ENSG00000090054.13	SPTLC1	20.2155	17.7505	3.799	2.0135
ENSG00000091651.8	ORC6	17.293	2.6925	1.9095	1.5935
ENSG00000092931.11	MFSD11	13.722	11.6095	6.456	6.026
ENSG00000094916.15	CBX5	37.591	8.377	6.0115	5.442
ENSG00000095380.10	NANS	17.041	3.5275	2.5675	1.6665
ENSG00000095787.21	WAC	27.3785	3.729	2.4815	2.283
ENSG00000096717.11	SIRT1	23.696	3.3885	4.025	3.7685
ENSG00000096746.17	HNRNPH3	21.8035	2.7195	2.846	2.3635
ENSG00000097007.17	ABL1	23.1915	2.1885	2.1855	1.689
ENSG00000100316.15	RPL3	138.292	12.7215	9.411	7.5365
ENSG00000100578.14	KIAA0586	11.0875	1.694	2.438	2.327
ENSG00000100664.10	EIF5	90.7565	28.0305	19.849	15.6125
ENSG00000100852.12	ARHGAP5	22.0185	3.394	3.249	3.4095
ENSG00000100941.8	PNN	53.719	5.052	5.3005	4.527
ENSG00000101019.21	UQCC1	10.7315	1.5735	0.954	0.751
ENSG00000101052.12	IFT52	17.8495	1.7465	1.871	1.4125
ENSG00000101558.13	VAPA	10.8125	4.0285	3.179	2.455
ENSG00000102054.17	RBBP7	104.838	16.205	17.373	14.254
ENSG00000102081.13	FMR1	16.065	2.5125	2.6375	2.424
ENSG00000102226.9	USP11	30.836	8.913	5.521	5.2935
ENSG00000102317.17	RBM3	86.8505	21.9935	8.456	4.504
ENSG00000102554.13	KLF5	21.7385	1.458	1.8005	1.6485
ENSG00000102572.14	STK24	12.3965	1.2185	1.5775	1.7845
ENSG00000102738.7	MRPS31	13.438	2.897	2.5005	2.4195
ENSG00000102786.14	INTS6	19.7185	21.3195	20.289	20.4375
ENSG00000103194.15	USP10	30.4515	2.897	2.2355	1.9035
ENSG00000103365.15	GGA2	13.472	2.163	1.4335	1.1705
ENSG00000103549.21	RNF40	66.3995	7.8695	8.984	7.596
ENSG00000104131.12	EIF3J	23.6075	9.9435	7.771	6.9385
ENSG00000104408.9	EIF3E	76.2305	13.137	13.6105	11.4885
ENSG00000105373.18	NOP53	17.318	2.3415	1.4705	1.195
ENSG00000105856.13	HBP1	15.577	3.8645	4.354	4.0085
ENSG00000105926.15	MPP6	11.86	0.9375	1.098	1.236
ENSG00000105968.18	H2AFV	37.899	3.304	3.074	2.07
ENSG00000106080.10	FKBP14	12.93	2.2275	2.3205	2.1755
ENSG00000106462.10	EZH2	41.217	6.24	5.6195	4.4655
ENSG00000106524.8	ANKMY2	12.2065	1.2185	1.304	1.1405
ENSG00000106537.7	TSPAN13	15.0515	5.935	5.1815	5.324
ENSG00000106615.9	RHEB	15.1405	2.4425	3.0105	2.954
ENSG00000106799.12	TGFBR1	26.2165	3.131	2.4485	1.742
ENSG00000107890.16	ANKRD26	12.578	2.395	2.3565	2.626
ENSG00000107937.18	GTPBP4	29.209	2.981	2.626	2.324
ENSG00000108021.19	FAM208B	42.2485	5.169	3.756	2.6705
ENSG00000108106.13	UBE2S	21.27	6.429	3.972	3.8005
ENSG00000108256.8	NUFIP2	68.9875	21.273	24.6295	21.103
ENSG00000108848.15	LUC7L3	64.57	22.8405	15.68	14.7525
ENSG00000108854.15	SMURF2	16.6045	1.831	1.624	1.637
ENSG00000109270.12	LAMTOR3	31.049	21.095	23.8785	20.334
ENSG00000109606.12	DHX15	86.699	10.772	11.2315	9.576
ENSG00000109756.8	RAPGEF2	11.828	1.4705	1.248	1.0035
ENSG00000109787.12	KLF3	13.12	1.824	1.609	1.3495
ENSG00000109805.9	NCAPG	47.958	8.987	5.0535	3.5505
ENSG00000110048.11	OSBP	12.1605	2.0115	1.269	1.164
ENSG00000110880.10	CORO1C	22.308	4.097	2.9075	2.678
ENSG00000110958.15	PTGES3	63.912	4.6645	3.9595	3.326
ENSG00000111328.6	CDK2AP1	21.008	1.417	1.186	1.2295
ENSG00000111530.12	CAND1	37.805	5.575	5.266	3.608
ENSG00000111605.16	CPSF6	37.877	7.456	6.9635	5.82
ENSG00000111615.13	KRR1	16.453	1.9845	2.028	2.049
ENSG00000111707.11	SUDS3	20.4885	2.63	1.7715	1.4805
ENSG00000111737.11	RAB35	15.686	1.9415	2.2265	2.3935
ENSG00000111786.8	SRSF9	34.859	3.742	3.492	3.039
ENSG00000112081.16	SRSF3	103.714	23.6	21.3885	20.248
ENSG00000112245.10	PTP4A1	19.4055	3.379	2.9115	2.38
ENSG00000112306.7	RPS12	590.097	81.5635	60.914	45.2325
ENSG00000112308.12	C6orf62	40.282	17.969	16.25	14.1075
ENSG00000112394.16	SLC16A10	15.322	4.1975	4.3755	3.912
ENSG00000112406.4	HECA	20.0105	5.7875	4.964	4.2825
ENSG00000112592.13	TBP	15.3775	1.963	2.0185	1.844
ENSG00000113300.11	CNOT6	13.002	1.0725	1.003	0.9625
ENSG00000113387.11	SUB1	29.87	5.668	6.347	6.8375
ENSG00000113558.18	SKP1	19.0185	11.7065	10.245	8.0495
ENSG00000113569.15	NUP155	72.498	10.0235	5.688	4.3145
ENSG00000113583.7	C5orf15	33.6915	3.4225	2.545	2.2005
ENSG00000113649.11	TCERG1	28.6025	2.765	3.3405	2.64
ENSG00000113712.17	CSNK1A1	36.0115	4.407	4.6695	4.047
ENSG00000113810.15	SMC4	60.951	12.3095	14.3745	13.6485
ENSG00000114416.17	FXR1	18.597	5.794	5.05	4.6545
ENSG00000114439.18	BBX	16.6485	1.476	1.174	1.008
ENSG00000114646.9	CSPG5	11.664	1.377	1.715	1.677
ENSG00000114902.13	SPCS1	11.416	1.1805	1.187	0.915
ENSG00000114982.17	KANSL3	25.554	3.248	1.976	2.163
ENSG00000115084.13	SLC35F5	13.236	0.995	1.9975	1.5175
ENSG00000115091.11	ACTR3	20.289	2.716	2.5785	2.2635
ENSG00000115109.13	EPB41L5	11.7105	2.3395	1.955	1.2065
ENSG00000115295.19	CLIP4	14.1185	11.726	10.5075	7.4415
ENSG00000115419.12	GLS	27.8035	21.2285	16.0775	13.544
ENSG00000115464.14	USP34	19.3445	1.4725	1.5785	1.1485
ENSG00000115808.11	STRN	11.0895	2.7235	2.1355	1.524
ENSG00000115825.9	PRKD3	18.03	1.743	1.52	1.2705
ENSG00000115942.8	ORC2	19.634	2.179	3.5705	3.859
ENSG00000116106.11	EPHA4	12.383	1.271	1.495	1.451
ENSG00000116337.15	AMPD2	13.0425	1.7195	1.396	1.2905
ENSG00000116350.16	SRSF4	27.462	3.52	3.2485	2.5075
ENSG00000116406.18	EDEM3	13.996	1.6765	1.058	0.783
ENSG00000116514.16	RNF19B	14.713	4.0445	4.018	3.5785
ENSG00000116560.10	SFPQ	212.601	26.263	21.185	16.9885
ENSG00000116717.11	GADD45A	17.5315	5.528	4.5245	3.5445
ENSG00000117143.13	UAP1	58.838	11.0895	10.6915	8.2855
ENSG00000117394.20	SLC2A1	17.8505	1.2835	1.4555	1.318
ENSG00000117500.12	TMED5	17.907	2.8025	2.232	1.954
ENSG00000117614.9	SYF2	32.7365	8.604	14.278	11.8195
ENSG00000117676.13	RPS6KA1	12.1205	2.527	2.033	2.0055
ENSG00000118007.12	STAG1	24.783	1.7175	1.7315	1.7465
ENSG00000118939.17	UCHL3	55.3845	11.1655	7.9245	6.0545
ENSG00000118946.11	PCDH17	12.093	2.2405	1.852	2.129
ENSG00000119185.12	ITGB1BP1	11.142	6.6115	3.878	3.1475
ENSG00000119396.10	RAB14	19.2975	4.23	3.9015	3.8285
ENSG00000119689.14	DLST	17.4265	5.652	3.8205	2.8465
ENSG00000119707.13	RBM25	24.176	7.9955	5.9165	4.8065
ENSG00000119787.13	ATL2	27.102	4.5815	4.72	4.293
ENSG00000119801.12	YPEL5	17.298	2.6965	2.737	2.51
ENSG00000119915.4	ELOVL3	17.274	2.1285	1.6585	2.592
ENSG00000119950.20	MXI1	16.888	1.8795	1.492	1.2175
ENSG00000119969.14	HELLS	29.9605	8.5575	6.4125	5.0905
ENSG00000120137.6	PANK3	27.286	2.511	2.191	1.566
ENSG00000120437.8	ACAT2	56.387	8.325	6.202	4.903
ENSG00000120526.10	NUDCD1	12.346	2.103	2.576	2.523
ENSG00000120690.15	ELF1	12.318	2.3175	5.132	4.498
ENSG00000120727.12	PAIP2	36.47	3.585	5.667	4.8045
ENSG00000120738.7	EGR1	14.0715	3.536	2.761	2.225
ENSG00000120742.10	SERP1	15.898	2.6025	2.276	1.62
ENSG00000121073.13	SLC35B1	15.804	4.917	4.0255	3.207
ENSG00000121741.16	ZMYM2	16.168	3.6495	2.571	2.211
ENSG00000122483.17	CCDC18	12.4655	2.1195	3.6545	3.242
ENSG00000122566.20	HNRNPA2B1	172.493	48.506	50.635	46.5645
ENSG00000122591.11	FAM126A	16.62	1.5575	1.9125	2.0165
ENSG00000122873.11	CISD1	19.099	4.6715	3.2385	2.213
ENSG00000122884.12	P4HA1	29.9485	3.338	3.277	3.5285
ENSG00000123066.7	MED13L	13.669	1.4075	1.0525	0.924
ENSG00000123104.11	ITPR2	11.135	3.7525	1.398	1.0415
ENSG00000123268.8	ATF1	15.805	5.564	3.824	3.535
ENSG00000123545.5	NDUFAF4	23.1095	3.0225	2.3015	2.2595
ENSG00000123595.7	RAB9A	18.688	3.165	2.128	2.131
ENSG00000123684.12	LPGAT1	25.3785	3.3215	1.9905	1.735
ENSG00000124181.14	PLCG1	13.207	2.761	2.876	2.9595
ENSG00000124193.14	SRSF6	58.11	8.925	6.4015	6.127
ENSG00000124784.8	RIOK1	29.8645	3.731	2.7745	2.577
ENSG00000125107.17	CNOT1	55.686	4.915	3.5195	3.516
ENSG00000125266.6	EFNB2	72.027	8.8715	8.7415	7.536
ENSG00000125445.10	MRPS7	28.343	5.411	3.1425	2.4775
ENSG00000125485.17	DDX31	17.5095	1.9915	0.9975	0.9545
ENSG00000125657.4	TNFSF9	13.729	22.4565	13.1335	9.426
ENSG00000125779.21	PANK2	12.0135	9.8985	9.119	7.0335
ENSG00000125844.15	RRBP1	13.527	4.953	6.1185	6.0095
ENSG00000126107.14	HECTD3	10.822	2.5755	1.526	1.424
ENSG00000126777.17	KTN1	25.1435	3.6245	3.154	2.9645
ENSG00000128908.15	INO80	24.3435	2.3465	1.684	1.4865
ENSG00000128989.10	ARPP19	36.9955	6.3495	4.5715	4.089
ENSG00000129675.15	ARHGEF6	12.536	2.3535	2.355	2.36
ENSG00000130254.11	SAFB2	13.612	2.0875	2.3685	1.852
ENSG00000130449.5	ZSWIM6	19.133	4.3455	5.06	4.8125
ENSG00000130714.15	POMT1	18.8075	1.334	1.2085	1.613
ENSG00000130741.10	EIF2S3	110.483	55.585	12.9365	6.736
ENSG00000130766.4	SESN2	23.3605	4.9255	2.9505	2.6565
ENSG00000130958.11	SLC35D2	18.3085	5.29	3.884	4.703
ENSG00000131375.9	CAPN7	11.7195	2.197	1.4855	1.3625
ENSG00000131871.14	SELENOS	16.0425	2.529	2.9485	2.8315
ENSG00000131873.5	CHSY1	22.0065	2.464	2.0425	2.0045
ENSG00000131979.18	GCH1	11.783	2.035	1.7795	1.6545
ENSG00000132128.16	LRRC41	26.6525	6.451	3.449	2.195
ENSG00000132300.18	PTCD3	23.805	7.332	6.7845	6.587
ENSG00000132603.13	NIP7	18.4285	3.475	2.316	1.902
ENSG00000132781.17	MUTYH	10.408	7.86	5.548	4.692
ENSG00000133639.4	BTG1	21.896	12.827	12.64	10.7195
ENSG00000133805.15	AMPD3	22.9275	7.489	10.0405	19.348
ENSG00000134202.10	GSTM3	11.442	2.85	1.8265	1.3345
ENSG00000134308.13	YWHAQ	115.853	12.7045	8.992	10.5475
ENSG00000134697.12	GNL2	41.6925	5.021	3.7695	3.519
ENSG00000134900.11	TPP2	47.291	8.5555	6.0305	5.5705
ENSG00000135018.13	UBQLN1	43.936	4.4825	5.673	4.5435
ENSG00000135048.13	TMEM2	14.5	2.837	5.058	4.9865
ENSG00000135334.8	AKIRIN2	15.805	1.5805	3.661	3.7985
ENSG00000135341.17	MAP3K7	20.714	1.7155	2.2555	1.7025
ENSG00000135766.8	EGLN1	13.095	1.3175	1.054	0.9
ENSG00000135801.9	TAF5L	20.3805	2.5	1.8155	1.6105
ENSG00000135870.11	RC3H1	11.902	1.0075	1.212	1.1375
ENSG00000136143.14	SUCLA2	12.009	1.462	1.9675	1.416
ENSG00000136271.10	DDX56	38.216	3.9585	3.1065	2.419
ENSG00000136754.17	ABI1	14.5	1.772	2.206	2.337
ENSG00000136816.15	TOR1B	16.018	4.128	2.6945	1.613
ENSG00000136868.10	SLC31A1	19.8265	2.334	1.5145	1.1685
ENSG00000136937.12	NCBP1	38.52	4.944	4.2115	3.706
ENSG00000136986.9	DERL1	12.201	1.2995	1.609	1.424
ENSG00000137073.21	UBAP2	12.601	3.805	3.1875	2.3505
ENSG00000137494.13	ANKRD42	11.2705	3.338	3.563	2.999
ENSG00000137504.13	CREBZF	24.7375	17.5405	11.619	10.413
ENSG00000137513.9	NARS2	17.315	1.831	2	1.847
ENSG00000137575.11	SDCBP	39.977	5.971	6.4635	4.7765
ENSG00000137831.14	UACA	11.492	1.9645	1.635	1.3325
ENSG00000137876.9	RSL24D1	32.9715	5.9315	6.415	5.544
ENSG00000137942.16	FNBP1L	16.86	3.2135	1.9675	1.456
ENSG00000137947.11	GTF2B	33.609	2.8315	4.594	3.594
ENSG00000138399.17	FASTKD1	12.877	1.563	1.1965	1.2145
ENSG00000138448.11	ITGAV	17.7065	2.7935	3.7225	2.8455
ENSG00000138660.11	AP1AR	16.714	3.0225	2.833	2.3265
ENSG00000138757.14	G3BP2	41.529	5.776	4.3685	4.592
ENSG00000139197.10	PEX5	13.221	1.669	2.292	2.0455
ENSG00000139372.14	TDG	14.1055	2.222	2.156	1.834
ENSG00000139514.12	SLC7A1	19.429	3.2065	3.2115	2.9005
ENSG00000139546.10	TARBP2	16.9795	7.1665	6.0565	7.395
ENSG00000139620.12	KANSL2	23.594	8.7755	8.9785	6.794
ENSG00000139737.21	SLAIN1	45.307	8.409	11.6445	9.626
ENSG00000139746.15	RBM26	19.1005	3.008	2.854	2.055
ENSG00000140157.14	NIPA2	34.113	2.5795	2.667	2.518
ENSG00000140463.13	BBS4	18.963	10.5185	8.9505	7.773
ENSG00000140521.12	POLG	32.6725	6.593	7.924	5.7765
ENSG00000141279.15	NPEPPS	12.233	1.368	0.7605	0.702
ENSG00000141384.12	TAF4B	16.451	2.4315	2.175	2.3825
ENSG00000141456.14	PELP1	19.1765	1.1805	1.73	1.557
ENSG00000141543.9	EIF4A3	52.3075	8.8215	12.983	12.3455
ENSG00000141627.13	DYM	10.621	2.3215	1.668	1.363
ENSG00000143013.12	LMO4	12.87	2.763	2.7325	2.468
ENSG00000143153.12	ATP1B1	14.2265	3.518	3.426	3.248
ENSG00000143164.15	DCAF6	18.1425	1.442	1.4785	1.2935
ENSG00000143337.18	TOR1AIP1	11.6385	2.4385	2.309	2.5945
ENSG00000143367.15	TUFT1	48.0595	19.9955	13.8605	11.866
ENSG00000143376.12	SNX27	30.462	10.6885	9.401	7.3235
ENSG00000143384.12	MCL1	128.715	9.4235	9.9595	8.9725
ENSG00000143393.16	PI4KB	23.4625	1.5555	1.9695	2.932
ENSG00000143420.18	ENSA	35.538	4.7135	3.621	2.9155
ENSG00000143442.21	POGZ	12.229	1.2525	1.2895	0.961
ENSG00000143476.17	DTL	32.944	4.877	4.7735	4.0855
ENSG00000143493.12	INTS7	29.0175	5.638	5.849	5.465
ENSG00000143776.18	CDC42BPA	12.3675	1.0255	1.001	0.9075
ENSG00000143952.19	VPS54	14.8205	1.5785	1.3505	1.2845
ENSG00000144231.10	POLR2D	22.071	3.4065	2.9985	1.9625
ENSG00000144357.16	UBR3	15.8375	5.3515	4.4775	3.933
ENSG00000144895.11	EIF2A	37.814	4.4375	4.7875	4.0005
ENSG00000144935.14	TRPC1	10.9845	2.042	1.436	1.011
ENSG00000145996.11	CDKAL1	10.719	1.8365	1.254	1.097
ENSG00000146223.14	RPL7L1	24.1425	3.1095	2.8255	2.614
ENSG00000146281.5	PM20D2	52.181	3.646	6.379	6.0005
ENSG00000146410.11	MTFR2	40.0765	4.4175	5.5715	4.419
ENSG00000146476.10	ARMT1	41.1075	4.3055	3.3745	2.985
ENSG00000146592.16	CREB5	13.8585	4.2625	4.793	5.619
ENSG00000147050.14	KDM6A	36.9075	6.5115	8.3465	6.3005
ENSG00000147274.14	RBMX	55.238	7.3105	4.041	3.6465
ENSG00000148110.15	MFSD14B	35.4005	5.526	4.354	3.4375
ENSG00000148154.9	UGCG	25.4155	4.7325	3.803	3.065
ENSG00000148296.6	SURF6	23.3855	4.8305	2.634	2.163
ENSG00000148908.14	RGS10	16.326	1.543	1.7965	1.473
ENSG00000149187.18	CELF1	20.7855	1.86	1.7385	1.3235
ENSG00000149212.11	SESN3	16.696	3.1435	3.6265	3.203
ENSG00000149503.12	INCENP	26.796	15.407	6.011	3.8485
ENSG00000150593.17	PDCD4	38.1825	10.7	15.5835	12.0595
ENSG00000151135.9	TMEM263	13.015	1.9915	1.626	0.9935
ENSG00000151292.17	CSNK1G3	15.045	3.149	1.6615	1.148
ENSG00000151893.14	CACUL1	14.4395	5.9695	4.173	3.5985
ENSG00000152413.14	HOMER1	11.535	4.625	3.2235	2.9955
ENSG00000152795.17	HNRNPDL	131.712	27.029	19.779	16.7835
ENSG00000153094.22	BCL2L11	10.865	2.7865	2.552	2.2755
ENSG00000153914.15	SREK1	11.6985	2.0725	2.298	2.1765
ENSG00000153975.9	ZUFSP	14.5905	2.0855	1.7535	1.632
ENSG00000154380.17	ENAH	24.673	2.3755	2.0565	1.664
ENSG00000154429.10	CCSAP	15.1335	1.013	1.2715	1.182
ENSG00000154734.14	ADAMTS1	41.75	5.6665	4.396	3.896
ENSG00000155096.13	AZIN1	32.9105	7.653	6.0625	4.783
ENSG00000155111.14	CDK19	11.91	2.7325	2.798	1.9285
ENSG00000155115.6	GTF3C6	52.0125	11.1655	9.807	7.4135
ENSG00000155189.11	AGPAT5	13.0855	3.5935	1.911	1.4005
ENSG00000156299.13	TIAM1	21.93	3.0785	2.345	1.913
ENSG00000156427.7	FGF18	12.0765	6.101	5.37	5.302
ENSG00000156508.17	EEF1A1	103.819	14.1555	7.749	6.103
ENSG00000156531.16	PHF6	32.8875	2.682	2.658	2.1865
ENSG00000157181.15	C1orf27	12.666	1.5265	1.965	1.7695
ENSG00000158042.8	MRPL17	14.367	3.08	2.2135	1.9535
ENSG00000159217.9	IGF2BP1	26.7975	13.509	4.84	4.494
ENSG00000160124.9	CCDC58	12.462	2.3645	2.729	2.3855
ENSG00000160310.17	PRMT2	12.564	2.7525	1.46	1.525
ENSG00000160447.6	PKN3	17.399	2.94	3.062	3.055
ENSG00000160803.7	UBQLN4	16.2485	1.721	3.0325	2.3
ENSG00000160818.16	GPATCH4	19.2455	4.0105	2.366	2.0125
ENSG00000161813.21	LARP4	16.1985	3.298	3.037	2.539
ENSG00000162413.16	KLHL21	14.0635	2.0875	1.48	1.14
ENSG00000162419.12	GMEB1	17.0915	10.0195	6.049	5.213
ENSG00000162613.16	FUBP1	76.3345	7.215	10.011	7.8665
ENSG00000162753.11	SLC9C2	21.35	12.921	11.221	12.918
ENSG00000162783.10	IER5	20.663	8.756	8.8135	8.126
ENSG00000162889.10	MAPKAPK2	10.8995	4.382	4.168	3.4515
ENSG00000162923.14	WDR26	18.1395	4.3345	4.243	4.3215
ENSG00000163002.12	NUP35	12.256	5.474	5.252	4.254
ENSG00000163006.11	CCDC138	16.7085	2.7555	1.584	1.969
ENSG00000163374.19	YY1AP1	14.6555	4.547	4.6175	4.077
ENSG00000163527.9	STT3B	42.602	4.7505	3.6625	3.3865
ENSG00000163659.12	TIPARP	16.1905	3.8135	3.959	2.995
ENSG00000163882.9	POLR2H	24.8235	2.5365	1.6755	1.414
ENSG00000164024.11	METAP1	22.9475	2.6385	2.2455	2.0675
ENSG00000164054.15	SHISA5	14.987	0.894	1.035	1.127
ENSG00000164091.11	WDR82	30.4945	3.6355	2.9755	2.9005
ENSG00000164105.3	SAP30	19.598	2.6695	2.4375	1.9865
ENSG00000164506.14	STXBP5	15.046	2.2315	2.4085	2.0335
ENSG00000164548.10	TRA2A	30.3115	4.048	6.001	5.6595
ENSG00000164924.17	YWHAZ	25.927	7.9145	7.3735	8.1905
ENSG00000165105.9	RASEF	16.3415	3.407	1.9725	1.464
ENSG00000165118.14	C9orf64	17.0175	8.7125	9.525	7.3675
ENSG00000165119.20	HNRNPK	167.653	20.9645	15.305	12.0035
ENSG00000165322.17	ARHGAP12	19.1335	1.9265	2.7835	3.049
ENSG00000165804.15	ZNF219	12.351	14.2285	13.096	11.9845
ENSG00000166037.10	CEP57	13.1285	2.92	1.999	1.5495
ENSG00000166197.16	NOLC1	130.247	9.711	10.1615	8.1265
ENSG00000166200.14	COPS2	16.8555	3.2175	2.317	2.44
ENSG00000166224.16	SGPL1	14.119	1.5715	1.322	0.9955
ENSG00000166233.14	ARIH1	19.5785	3.8245	5.493	5.5415
ENSG00000166329.2	CCDC182	17.5675	20.206	15.31	14.6055
ENSG00000166478.9	ZNF143	23.1045	3.686	3.1455	2.3095
ENSG00000166503.8	HDGFL3	11.8185	2.0115	1.848	1.676
ENSG00000166710.17	B2M	31.0975	5.6775	4.4405	4.1045
ENSG00000167566.16	NCKAP5L	18.3905	14.0845	10.83	11.2195
ENSG00000167721.10	TSR1	59.991	13.1565	12.2295	9.6005
ENSG00000168028.13	RPSA	50.137	19.0615	17.293	13.384
ENSG00000168175.14	MAPK1IP1L	12.768	2.4655	2.278	1.882
ENSG00000168264.10	IRF2BP2	31.8935	2.619	2.502	2.356
ENSG00000168280.16	KIF5C	10.5495	2.0005	1.6735	1.359
ENSG00000168314.17	MOBP	14.5065	18.464	14.444	10.166
ENSG00000168564.5	CDKN2AIP	12.19	1.9305	1.7875	1.649
ENSG00000169139.11	UBE2V2	16.1265	4.4555	3.1685	3.33
ENSG00000169504.14	CLIC4	36.4605	5.25	3.4375	3.0995
ENSG00000169641.13	LUZP1	14.4335	7.3015	7.8135	6.2315
ENSG00000169896.16	ITGAM	27.7375	6.669	6.6075	3.7975
ENSG00000169905.12	TOR1AIP2	18.9955	5.389	5.135	5.2085
ENSG00000170144.20	HNRNPA3	21.918	10.834	10.693	12.508
ENSG00000170322.14	NFRKB	21.6265	3.3185	3.2305	2.844
ENSG00000170836.11	PPM1D	27.774	3.466	3.406	2.9135
ENSG00000171109.18	MFN1	25.128	3.7415	3.22	3.127
ENSG00000171453.17	POLR1C	22.5145	1.813	2.107	1.536
ENSG00000172201.11	ID4	55.805	15.8885	7.627	4.93
ENSG00000172757.12	CFL1	88.5345	11.815	11.2175	12.228
ENSG00000172888.11	ZNF621	17.942	2.758	3.144	3.2925
ENSG00000172922.8	RNASEH2C	19.5755	5.5945	3.8455	3.1645
ENSG00000172943.19	PHF8	12.6805	4.8465	4.8915	4.1895
ENSG00000173276.13	ZBTB21	11.156	1.103	1.441	1.3555
ENSG00000173545.4	ZNF622	25.984	6.2885	4.746	4.6575
ENSG00000173575.20	CHD2	17.4195	1.669	1.474	1.9525
ENSG00000173726.10	TOMM20	126.131	18.7295	14.171	9.217
ENSG00000173933.19	RBM4	12.321	14.918	11.967	9.7045
ENSG00000174106.2	LEMD3	11.643	1.9285	2.2705	1.88
ENSG00000174226.8	SNX31	17.601	22.037	23.997	19.8855
ENSG00000174371.16	EXO1	33.6865	3.729	2.4575	2.167
ENSG00000174485.15	DENND4A	13.2705	2.689	3.417	2.595
ENSG00000174738.12	NR1D2	23.3385	6.0745	5.9975	5.584
ENSG00000174953.13	DHX36	11.4715	2.92	1.369	0.9935
ENSG00000175130.6	MARCKSL1	112.87	15.31	12.6225	8.7155
ENSG00000175305.17	CCNE2	14.0145	1.3495	1.633	0.928
ENSG00000175390.13	EIF3F	12.5675	1.249	1.017	0.736
ENSG00000175582.19	RAB6A	13.187	2.0295	1.529	1.3715
ENSG00000176087.14	SLC35A4	12.009	0.8885	0.745	0.861
ENSG00000176102.11	CSTF3	17.268	3.4785	2.5675	2.1245
ENSG00000177238.13	TRIM72	10.8515	2.3325	9.507	11.24
ENSG00000177873.12	ZNF619	15.4085	13.009	8.6565	6.9445
ENSG00000177889.9	UBE2N	22.653	6.1585	4.496	3.695
ENSG00000177917.10	ARL6IP6	12.3105	4.199	3.3975	2.8285
ENSG00000177954.11	RPS27	10.8075	15.187	8.001	6.711
ENSG00000178538.9	CA8	14.746	1.5755	3.824	4.251
ENSG00000178695.5	KCTD12	44.8385	16.3445	14.585	15.3865
ENSG00000180891.12	CUEDC1	14.053	12.8825	11.593	13.2625
ENSG00000180957.17	PITPNB	15.1575	3.3685	2.4035	1.897
ENSG00000180992.6	MRPL14	58.707	6.4345	8.005	7.4125
ENSG00000181016.9	LSMEM1	26.798	12.8795	18.27	16.498
ENSG00000181274.6	FRAT2	13.3765	3.059	3.923	3.308
ENSG00000181544.13	FANCB	11.034	2.817	2.4385	1.982
ENSG00000181610.12	MRPS23	41.809	39.5085	28.2575	23.5385
ENSG00000182004.12	SNRPE	36.7815	12.4565	8.493	7.065
ENSG00000182149.20	IST1	15.9355	6.1155	4.837	3.701
ENSG00000182197.10	EXT1	10.316	3.003	2.4715	1.9485
ENSG00000182224.11	CYB5D1	13.8525	1.6585	2.342	2.033
ENSG00000182253.14	SYNM	11.0305	4.61	3.903	3.7035
ENSG00000182287.14	AP1S2	29.976	7.687	5.6355	4.887
ENSG00000182551.13	ADI1	16.7395	2.163	1.55	1.3005
ENSG00000182952.4	HMGN4	43.833	18.2595	3.5365	2.8145
ENSG00000183337.16	BCOR	59.1985	6.5935	3.998	3.715
ENSG00000183508.4	FAM46C	31.576	10.254	9.939	10.373
ENSG00000183576.12	SETD3	23.7795	3.931	3.033	2.4685
ENSG00000183779.6	ZNF703	15.6645	6.575	7.616	5.5095
ENSG00000183864.4	TOB2	22.92	3.578	2.6585	2.231
ENSG00000184007.18	PTP4A2	29.9885	3.807	2.8375	2.5405
ENSG00000184368.15	MAP7D2	25.286	6.429	5.597	5.246
ENSG00000184831.13	APOO	11.725	1.7915	1.1375	1.073
ENSG00000185104.19	FAF1	24.4245	2.327	2.0215	1.757
ENSG00000185127.6	C6orf120	23.0475	10.9265	3.555	1.9795
ENSG00000185246.17	PRPF39	13.8485	1.112	1.1935	1.0845
ENSG00000185722.16	ANKFY1	11.262	3.435	1.93	1.652
ENSG00000185728.16	YTHDF3	13.7665	4.304	3.0765	2.274
ENSG00000185950.8	IRS2	19.248	3.5005	2.6735	2.0255
ENSG00000185963.13	BICD2	18.4515	4.2445	3.7275	2.7985
ENSG00000186106.11	ANKRD46	24.36	14.999	12.4835	10.182
ENSG00000186416.13	NKRF	19.536	2.801	2.8025	2.751
ENSG00000187079.16	TEAD1	16.025	5.095	4.155	3.5235
ENSG00000188060.7	RAB42	10.6435	13.136	10.729	14.883
ENSG00000188529.14	SRSF10	43.079	18.864	10.294	8.4855
ENSG00000189306.10	RRP7A	17.009	4.6015	1.9285	1.0015
ENSG00000189403.14	HMGB1	13.1255	3.2855	3.204	2.659
ENSG00000196220.15	SRGAP3	13.2775	16.4215	16.042	16.1885
ENSG00000196262.13	PPIA	46.8795	18.403	12.858	10.034
ENSG00000196368.4	NUDT11	13.8195	0.8095	1.088	0.9625
ENSG00000196378.11	ZNF34	28.6635	6.4325	5.0315	5.322
ENSG00000196504.15	PRPF40A	54.713	13.508	12.2725	9.6325
ENSG00000196591.11	HDAC2	22.607	2.6455	4.802	4.228
ENSG00000196792.11	STRN3	16.134	1.507	1.3015	1.409
ENSG00000196890.4	HIST3H2BB	24.4595	3.4535	2.9025	2.1155
ENSG00000197323.11	TRIM33	20.7225	5.234	4.0535	3.668
ENSG00000197498.12	RPF2	40.628	7.0435	12.5665	10.542
ENSG00000197535.14	MYO5A	15.955	2.7755	3.1605	2.768
ENSG00000197601.12	FAR1	21.1065	3.529	4.123	2.9465
ENSG00000197982.13	C1orf122	15.0665	7.775	4.264	3.717
ENSG00000198015.12	MRPL42	17.2735	2.6295	2.6445	2.2765
ENSG00000198087.7	CD2AP	14.284	1.512	1.651	1.323
ENSG00000198169.8	ZNF251	13.994	9.7275	8.935	7.829
ENSG00000198265.11	HELZ	16.964	3.1	3.418	2.911
ENSG00000198380.12	GFPT1	11.679	1.4075	1.799	1.475
ENSG00000198431.15	TXNRD1	40.5385	4.032	2.8155	2.8575
ENSG00000198492.15	YTHDF2	32.0985	2.9935	2.6075	2.197
ENSG00000198561.13	CTNND1	20.9535	2.2965	3.678	3.7765
ENSG00000198732.10	SMOC1	13.037	7.1625	7.252	7.454
ENSG00000198791.11	CNOT7	13.3745	2.332	1.476	1.2305
ENSG00000198887.8	SMC5	16.12	2.435	2.6255	2.1245
ENSG00000198900.5	TOP1	19.068	2.202	1.512	1.341
ENSG00000198909.7	MAP3K3	13.5635	1.665	0.7955	0.899
ENSG00000198954.7	KIF1BP	32.117	4.5835	3.46	2.91
ENSG00000203814.6	HIST2H2BF	25.136	4.1145	2.312	2.053
ENSG00000204186.7	ZDBF2	20.154	2.8495	3.863	2.7415
ENSG00000204386.10	NEU1	23.0525	8.5055	3.5315	1.9555
ENSG00000204590.12	GNL1	11.17	1.1425	1.5285	2.082
ENSG00000204856.11	FAM216A	22.8615	2.013	3.357	3.441
ENSG00000204899.5	MZT1	45.815	4.506	2.7075	2.405
ENSG00000205339.9	IPO7	42.9975	6.5875	5.7215	4.723
ENSG00000213741.9	RPS29	39.6805	19.049	15.454	12.9015
ENSG00000214078.12	CPNE1	31.482	7.945	4.6415	4.684
ENSG00000221914.9	PPP2R2A	15.848	5.9745	7.253	6.4995
ENSG00000223496.2	EXOSC6	10.9585	1.6745	1.23	0.975
ENSG00000243927.5	MRPS6	20.5025	9.5815	7.747	7.3765
ENSG00000256525.6	POLG2	34.2115	11.89	9.127	9.59
ENSG00000259956.1	RBM15B	22.174	2.72	2.645	2.0435
ENSG00000276023.4	DUSP14	18.099	2.3285	2.268	2.009
ENSG00000278540.4	ACACA	17.136	1.7645	1.6295	1.391
